# Supplementary material
Source: publisher figshare collection journal article supplement (https://frontiersin.figshare.com/ndownloader/files/13274534)

**Supplementary Figure 2: Determination of the structure of the different ADP-Glc PPases versions.** (A) Reducing SDS-PAGE and (B) determination of molecular mass by gel filtration chromatography of recombinant proteins: TaeL/StuS (open square), TaeL/TaeS (open circle), StuL/StuS (dark circle) and StuL/TaeS (dark square). M: molecular mass marker.

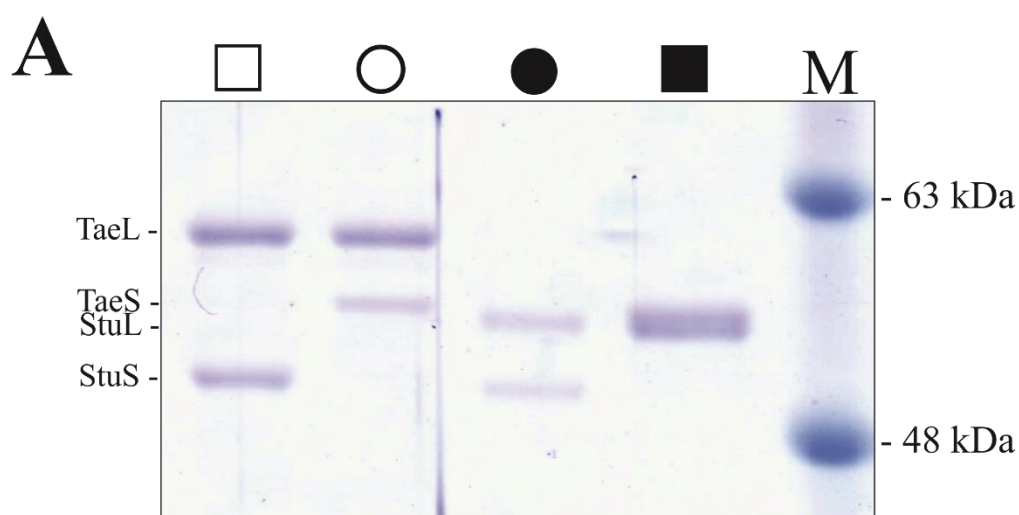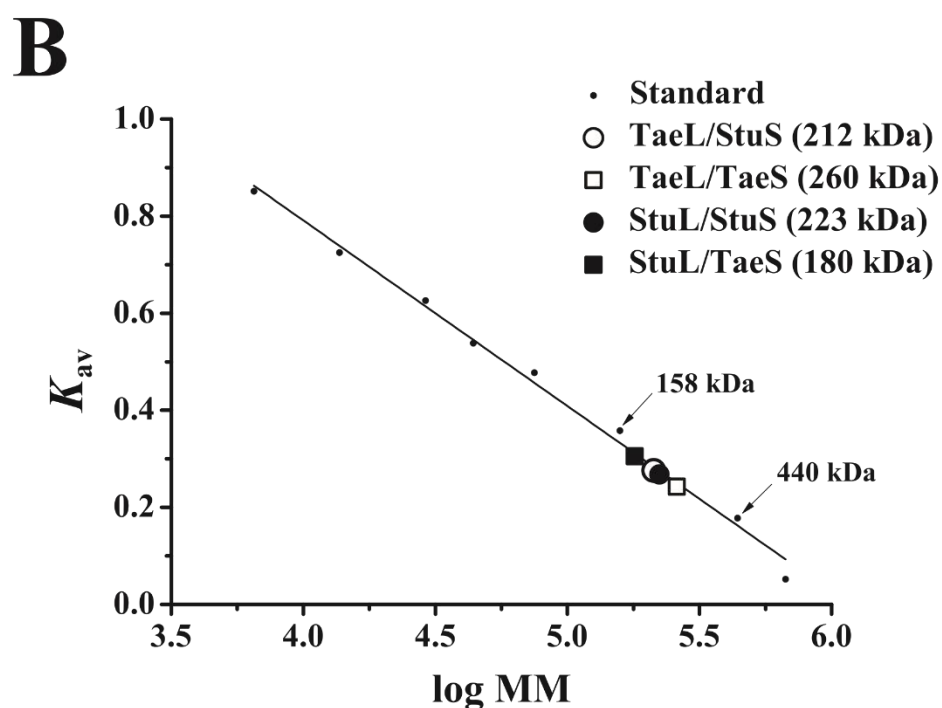

Supplement: Supplementary file [file 13274534]
